# Supplementary material for: Polar semi-volatile organic compounds in biomass burning emissions and their chemical transformations during aging in an oxidation flow reactor
Source: Copernicus journal article supplement (doi:10.5194/acp-2019-1179), 2020-01-23
Supplement: Supplementary file 1 [file acp-2019-1179-supplement.pdf]

## *Supplementary Material*

### **Polar semi-volatile organic compounds in biomass burning emissions and their chemical transformations during aging in an oxidation flow reactor**

Deep Sengupta,<sup>1</sup> Vera Samburova,<sup>1</sup> Chiranjivi Bhattarai,<sup>1</sup> Adam C. Watts,<sup>1</sup> Hans Moosmüller,<sup>1</sup> Andrey Y. Khlystov<sup>1</sup>

<sup>1</sup>Desert Research Institute, 2215 Raggio Parkway, Reno, NV 89512, USA

*Correspondence to:* vera.samburova@dri.edu

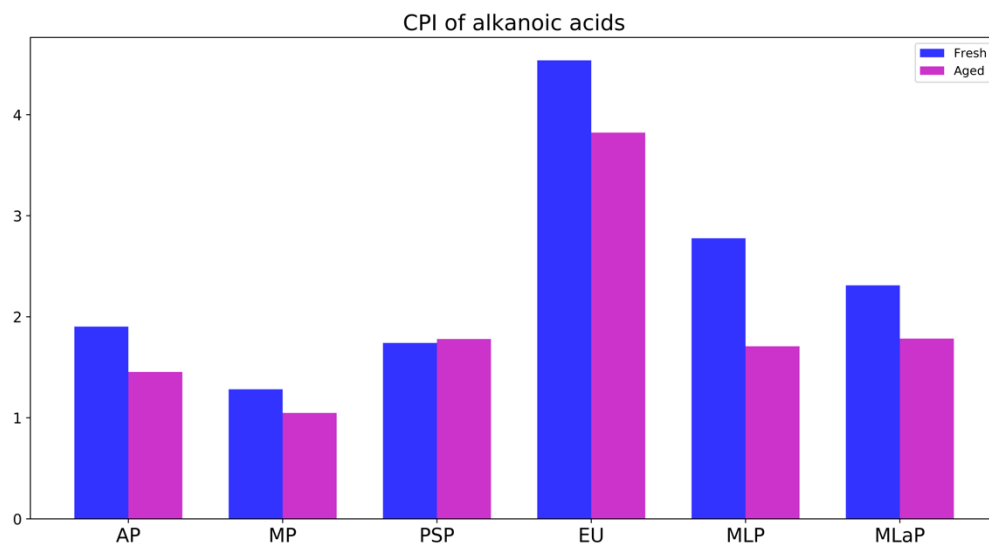

Figure S1. Carbon performance index (CPI) of gas- and particle-phase alkanolic acids assigned to six different fuels: Alaskan peat (AP), Moscow peat (MP), Pskov peat (PSP), Eucalyptus (EU), Malaysian peat (MLP), Malaysian agricultural peat (MLaP). CPI was calculated by calculating even-over-odd ratios of monocarboxylic acids ranging from C<sub>6</sub> to C<sub>24</sub>.

**Table S1: Emission factors (in mg kg<sup>-1</sup>) for fresh emissions in both gas and particle phase**

| Compound name                    | Alaskan peat |            | Moscow peat |            | Pskov peat |            | Eucalyptus |           | Malaysian peat |            | Malaysian agro peat |            | Group name                |
|----------------------------------|--------------|------------|-------------|------------|------------|------------|------------|-----------|----------------|------------|---------------------|------------|---------------------------|
|                                  | Gas          | Particle   | Gas         | Particle   | Gas        | Particle   | Gas        | Particle  | Gas            | Particle   | Gas                 | Particle   |                           |
| hexanoic acid                    | 8.99±0.88    | 0.93±0.00  | 20.62±2.01  | 0.41±0.00  | 14.23±1.39 | 1.02±0.00  | 0.00±0.00  | 0.06±0.00 | 6.49±0.63      | 1.00±0.00  | 4.90±0.48           | 1.90±0.00  | monocarboxylic acids      |
| heptanoic acid                   | 16.04±1.80   | 0.75±0.23  | 13.57±1.52  | 0.42±0.12  | 19.34±2.17 | 1.02±0.31  | 0.28±0.03  | 0.05±0.02 | 8.85±0.99      | 0.45±0.13  | 7.01±0.79           | 1.26±0.38  | monocarboxylic acids      |
| me-malonic                       | 0.00±0.00    | 0.00±0.00  | 0.00±0.00   | 0.00±0.00  | 0.00±0.00  | 0.00±0.00  | 0.00±0.00  | 0.00±0.00 | 0.04±0.00      | 0.00±0.00  | 0.00±0.00           | 0.01±0.00  | dicarboxylic acids        |
| guaiacol                         | 0.87±0.08    | 0.19±0.00  | 31.94±3.10  | 1.55±0.00  | 48.41±4.70 | 1.26±0.00  | 0.02±0.00  | 0.00±0.00 | 67.82±6.58     | 0.74±0.00  | 0.50±0.05           | 0.06±0.00  | methoxyphenol derivatives |
| benzoic acid                     | 0.00±0.00    | 1.51±0.00  | 0.00±0.00   | 7.00±0.00  | 0.00±0.00  | 6.37±0.00  | 0.00±0.00  | 0.03±0.00 | 0.00±0.00      | 5.65±0.00  | 7.86±0.77           | 2.12±0.00  | aromatic acids            |
| octanoic acid                    | 16.56±1.56   | 1.17±0.00  | 21.34±2.01  | 2.41±0.00  | 24.32±2.30 | 3.30±0.00  | 0.42±0.04  | 0.11±0.00 | 10.14±0.96     | 0.93±0.00  | 6.45±0.61           | 3.93±0.00  | monocarboxylic acids      |
| maleic acid                      | 2.52±0.35    | 0.91±0.00  | 5.93±0.83   | 1.19±0.00  | 7.01±0.98  | 2.08±0.00  | 0.18±0.02  | 0.00±0.00 | 2.08±0.29      | 0.57±0.00  | 0.00±0.00           | 0.00±0.00  | dicarboxylic acids        |
| succinic acid                    | 0.00±0.00    | 4.43±0.59  | 5.55±0.64   | 6.98±0.93  | 2.92±0.33  | 12.56±1.67 | 0.00±0.00  | 0.06±0.01 | 0.00±0.00      | 5.65±0.75  | 0.00±0.00           | 0.00±0.00  | dicarboxylic acids        |
| 4-me-guaiacol                    | 1.46±0.14    | 0.00±0.00  | 2.14±0.21   | 0.00±0.00  | 2.71±0.26  | 0.00±0.00  | 0.03±0.00  | 0.00±0.00 | 3.06±0.30      | 0.19±0.00  | 0.71±0.07           | 0.30±0.00  | methoxyphenol derivatives |
| me-succinic acid                 | 4.70±0.48    | 1.29±0.19  | 0.00±0.00   | 2.12±0.31  | 8.57±0.87  | 3.06±0.44  | 0.17±0.02  | 0.04±0.01 | 2.11±0.21      | 1.03±0.15  | 0.56±0.06           | 0.00±0.00  | dicarboxylic acids        |
| o-toluid                         | 0.81±0.09    | 0.00±0.00  | 10.08±1.12  | 1.25±0.00  | 3.58±0.40  | 0.00±0.00  | 0.00±0.00  | 0.00±0.00 | 2.64±0.29      | 0.41±0.00  | 0.35±0.04           | 0.09±0.00  | aromatic acids            |
| m-toluid                         | 0.51±0.06    | 0.49±0.14  | 3.53±0.39   | 3.35±0.96  | 1.52±0.17  | 1.87±0.53  | 0.00±0.00  | 0.04±0.01 | 1.22±0.14      | 1.06±0.30  | 0.41±0.04           | 0.42±0.12  | aromatic acids            |
| nonanoic acid                    | 5.14±0.61    | 2.19±0.00  | 6.98±0.83   | 5.83±0.00  | 5.16±0.61  | 4.24±0.00  | 0.00±0.00  | 0.20±0.00 | 3.88±0.46      | 2.24±0.00  | 0.00±0.00           | 15.74±0.00 | monocarboxylic acids      |
| p-toluid                         | 0.00±0.00    | 0.37±0.18  | 0.00±0.00   | 4.97±2.49  | 0.00±0.00  | 3.39±1.69  | 0.00±0.00  | 0.03±0.01 | 0.60±0.08      | 1.40±0.70  | 0.02±0.00           | 0.29±0.14  | aromatic acids            |
| 4-ethyl-guaiacol                 | 0.00±0.00    | 0.10±0.00  | 5.76±0.56   | 0.00±0.00  | 1.27±0.12  | 0.00±0.00  | 0.00±0.00  | 0.00±0.00 | 1.54±0.15      | 0.00±0.00  | 0.31±0.03           | 0.10±0.00  | methoxyphenol derivatives |
| 2,6-dimethylbenzoic acid         | 0.00±0.00    | 0.00±0.00  | 0.00±0.00   | 0.00±0.00  | 0.00±0.00  | 0.00±0.00  | 0.00±0.00  | 0.00±0.00 | 0.40±0.00      | 0.24±0.00  | 0.26±0.00           | 0.00±0.00  | aromatic acids            |
| syngiol                          | 0.00±0.00    | 0.00±0.00  | 20.37±2.70  | 0.00±0.00  | 0.92±0.12  | 0.00±0.00  | 0.14±0.02  | 0.19±0.03 | 0.61±0.08      | 3.76±0.50  | 5.06±0.67           | 0.39±0.05  | methoxyphenol derivatives |
| glutaric acid                    | 0.22±0.03    | 2.13±0.29  | 1.70±0.26   | 6.88±0.92  | 1.80±0.27  | 16.65±2.24 | 0.00±0.00  | 0.10±0.01 | 0.23±0.04      | 1.60±0.22  | 0.10±0.01           | 0.05±0.01  | dicarboxylic acids        |
| 2-methylglutaric                 | 0.00±0.00    | 4.82±0.00  | 3.54±0.00   | 1.54±0.00  | 8.17±0.00  | 2.93±0.00  | 0.00±0.00  | 0.11±0.00 | 0.00±0.00      | 2.66±0.00  | 0.00±0.00           | 0.79±0.00  | dicarboxylic acids        |
| 3-methylglutaric                 | 0.00±0.00    | 0.00±0.00  | 0.00±0.00   | 0.16±0.00  | 0.09±0.00  | 0.00±0.00  | 0.00±0.00  | 0.00±0.00 | 0.00±0.00      | 0.14±0.00  | 0.00±0.00           | 0.00±0.00  | dicarboxylic acids        |
| 2,5-dimethylbenzoic acid         | 0.29±0.04    | 0.41±0.12  | 0.53±0.07   | 2.16±0.62  | 0.38±0.05  | 1.47±0.42  | 0.00±0.00  | 0.03±0.01 | 0.47±0.07      | 0.89±0.25  | 0.00±0.00           | 0.31±0.09  | aromatic acids            |
| 2,4-dimethylbenzoic acid         | 0.00±0.00    | 0.47±0.00  | 0.00±0.00   | 1.96±0.00  | 0.00±0.00  | 0.00±0.00  | 0.00±0.00  | 0.00±0.00 | 0.00±0.00      | 0.52±0.00  | 0.00±0.00           | 0.00±0.00  | aromatic acids            |
| 2,3-and 3,5-dimethylbenzoic acid | 0.40±0.00    | 0.00±0.00  | 0.59±0.00   | 0.48±0.00  | 0.45±0.00  | 0.00±0.00  | 0.04±0.00  | 0.00±0.00 | 0.40±0.00      | 0.27±0.00  | 0.58±0.00           | 0.22±0.00  | aromatic acids            |
| decanoic acid                    | 2.48±0.24    | 3.90±0.00  | 2.55±0.25   | 4.68±0.00  | 2.69±0.26  | 6.76±0.00  | 0.04±0.00  | 0.25±0.00 | 1.87±0.18      | 3.03±0.00  | 0.61±0.06           | 6.15±0.00  | monocarboxylic acids      |
| 4-allyl-guaiacol (eugenol)       | 0.10±0.02    | 0.00±0.00  | 6.36±0.98   | 0.00±0.00  | 0.63±0.10  | 0.00±0.00  | 0.00±0.00  | 0.00±0.00 | 0.51±0.08      | 0.00±0.00  | 0.00±0.00           | 0.03±0.00  | methoxyphenol derivatives |
| 4-methyl-syngiol                 | 3.15±0.38    | 1.12±0.26  | 6.31±0.77   | 4.47±1.05  | 1.14±0.14  | 5.60±1.31  | 0.44±0.05  | 0.59±0.14 | 1.34±0.16      | 10.42±2.44 | 5.17±0.63           | 0.33±0.08  | methoxyphenol derivatives |
| 3,4-dimethylbenzoic acid         | 0.00±0.00    | 0.69±0.00  | 0.00±0.00   | 3.35±0.00  | 0.00±0.00  | 2.10±0.00  | 0.00±0.00  | 0.03±0.00 | 0.07±0.01      | 1.09±0.00  | 0.09±0.01           | 0.19±0.00  | aromatic acids            |
| hexanedioic (adipic) acid        | 0.00±0.00    | 11.91±1.27 | 0.00±0.00   | 4.73±0.50  | 1.55±0.29  | 0.00±0.00  | 0.14±0.03  | 0.00±0.00 | 0.08±0.01      | 3.71±0.39  | 0.00±0.00           | 1.26±0.13  | dicarboxylic acids        |
| salicylic acid                   | 0.00±0.00    | 2.54±0.45  | 0.38±0.04   | 6.95±1.23  | 0.23±0.03  | 6.07±1.07  | 0.02±0.00  | 0.05±0.01 | 0.00±0.00      | 3.09±0.55  | 0.00±0.00           | 1.28±0.23  | aromatic acids            |
| cis-pinonic acid                 | 1.24±0.00    | 0.00±0.00  | 5.33±0.00   | 0.00±0.00  | 2.40±0.00  | 0.00±0.00  | 0.14±0.00  | 0.00±0.00 | 1.36±0.00      | 0.00±0.00  | 1.39±0.00           | 0.00±0.00  | dicarboxylic acids        |
| 3-methylgladiol                  | 0.00±0.00    | 0.00±0.00  | 0.00±0.00   | 0.00±0.00  | 0.00±0.00  | 0.00±0.00  | 0.00±0.00  | 0.00±0.00 | 0.56±0.00      | 0.00±0.00  | 0.00±0.00           | 0.00±0.00  | dicarboxylic acids        |
| 4-formyl-guaiacol (vanillin)     | 5.47±0.60    | 3.64±0.42  | 26.83±2.93  | 12.76±1.47 | 33.06±3.61 | 13.59±1.56 | 0.11±0.01  | 0.20±0.02 | 18.27±1.99     | 8.75±1.01  | 0.70±0.08           | 2.89±0.33  | methoxyphenol derivatives |
| undecanoic acid                  | 1.00±0.10    | 11.86±1.14 | 1.80±0.18   | 8.22±0.79  | 1.52±0.15  | 20.75±2.00 | 0.03±0.00  | 0.17±0.02 | 0.97±0.10      | 6.12±0.59  | 0.13±0.01           | 3.86±0.37  | monocarboxylic acids      |
| isoeugenol                       | 0.09±0.01    | 1.11±0.19  | 6.01±0.78   | 4.07±0.71  | 0.64±0.08  | 3.87±0.67  | 0.00±0.00  | 0.00±0.00 | 0.31±0.04      | 2.09±0.36  | 0.00±0.00           | 0.02±0.00  | methoxyphenol derivatives |
| heptanedioic (pimelic) acid      | 0.00±0.00    | 2.46±0.41  | 0.00±0.00   | 3.27±0.55  | 0.00±0.00  | 6.71±1.12  | 0.00±0.00  | 0.00±0.00 | 0.01±0.00      | 2.44±0.41  | 0.00±0.00           | 0.00±0.00  | dicarboxylic acids        |
| 2,3-dimethylbenzoic acid         | 3.54±1.06    | 0.00±0.00  | 17.55±5.26  | 1.00±0.22  | 5.45±1.63  | 0.00±0.00  | 0.39±0.12  | 0.00±0.00 | 4.41±1.32      | 0.00±0.00  | 3.43±1.03           | 0.02±0.01  | aromatic acids            |
| acetovanillone                   | 0.80±0.09    | 4.71±0.46  | 23.86±2.78  | 40.63±3.96 | 17.06±1.99 | 33.35±3.25 | 2.51±0.29  | 0.43±0.04 | 9.92±1.16      | 19.74±1.92 | 24.85±2.90          | 2.59±0.25  | methoxyphenol derivatives |
| 2,6-dimethoxybenzoic acid        | 0.00±0.00    | 0.00±0.00  | 0.00±0.00   | 0.00±0.00  | 0.00±0.00  | 0.00±0.00  | 0.00±0.00  | 0.00±0.00 | 0.00±0.00      | 0.00±0.00  | 0.25±0.00           | 0.01±0.00  | aromatic acids            |
| dodecanoic (lauric) acid         | 1.40±0.29    | 12.55±1.23 | 1.24±0.26   | 13.39±1.31 | 2.98±0.62  | 14.00±1.37 | 0.15±0.03  | 0.38±0.04 | 0.27±0.06      | 7.38±0.72  | 0.00±0.00           | 8.57±0.84  | monocarboxylic acids      |
| 2,5-dimethoxybenzoic acid        | 0.00±0.00    | 0.00±0.00  | 0.00±0.00   | 0.00±0.00  | 0.00±0.00  | 0.00±0.00  | 0.00±0.00  | 0.00±0.00 | 0.00±0.00      | 0.00±0.00  | 0.66±0.00           | 0.02±0.00  | aromatic acids            |
| phthalic acid                    | 0.00±0.00    | 0.82±0.14  | 0.00±0.00   | 0.00±0.00  | 0.00±0.00  | 0.00±0.00  | 0.00±0.00  | 0.00±0.00 | 0.00±0.00      | 1.38±0.24  | 0.00±0.00           | 0.00±0.00  | aromatic acids            |
| suberic acid                     | 0.00±0.00    | 1.95±0.21  | 0.73±0.00   | 1.55±0.17  | 0.00±0.00  | 3.24±0.36  | 0.00±0.00  | 0.21±0.02 | 0.27±0.00      | 2.64±0.29  | 0.33±0.00           | 7.65±0.84  | dicarboxylic acids        |
| levoglucosan*                    | 0.00±0.00    | 4.70±0.47  | 0.74±0.10   | 1.76±0.18  | 1.96±0.25  | 6.62±0.67  | 0.03±0.00  | 4.19±0.42 | 0.74±0.10      | 4.21±0.43  | 0.09±0.01           | 65.44±6.61 | anhydrosugars             |
| 3,5-dimethoxybenzoic acid        | 0.00±0.00    | 0.00±0.00  | 0.00±0.00   | 0.00±0.00  | 0.00±0.00  | 0.00±0.00  | 0.00±0.00  | 0.00±0.00 | 0.41±0.09      | 0.00±0.00  | 0.21±0.05           | 1.23±0.19  | aromatic acids            |
| syngiolaldehyde                  | 0.20±0.03    | 2.23±0.22  | 0.49±0.07   | 2.12±0.21  | 0.39±0.06  | 8.56±0.84  | 0.05±0.01  | 0.58±0.06 | 1.27±0.19      | 3.67±0.36  | 0.37±0.05           | 13.85±1.35 | methoxyphenol derivatives |
| 3,4-dimethoxybenzoic acid        | 0.21±0.00    | 0.00±0.00  | 0.00±0.00   | 1.14±0.15  | 0.00±0.00  | 0.00±0.00  | 0.00±0.00  | 0.00±0.00 | 0.24±0.00      | 1.00±0.13  | 0.00±0.00           | 5.64±0.75  | aromatic acids            |
| 2,4-dimethoxybenzoic acid        | 0.00±0.00    | 0.00±0.00  | 2.06±0.30   | 0.00±0.00  | 0.00±0.00  | 0.00±0.00  | 0.00±0.00  | 0.00±0.00 | 0.00±0.00      | 0.53±0.08  | 0.00±0.00           | 0.00±0.00  | aromatic acids            |
| tridecanoic acid                 | 0.14±0.03    | 4.92±0.51  | 0.26±0.05   | 8.14±0.85  | 0.21±0.04  | 6.28±0.65  | 0.00±0.00  | 0.07±0.01 | 0.19±0.04      | 2.45±0.25  | 0.00±0.00           | 3.08±0.32  | monocarboxylic acids      |
| isophthalic acid                 | 0.00±0.00    | 0.40±0.04  | 0.00±0.00   | 0.48±0.05  | 0.00±0.00  | 0.64±0.06  | 0.00±0.00  | 0.05±0.00 | 0.00±0.00      | 1.13±0.11  | 1.54±0.18           | 0.81±0.08  | aromatic acids            |
| vanillic acid                    | 2.67±0.31    | 29.50±3.40 | 3.45±0.40   | 10.50±1.08 | 1.63±0.19  | 21.40±2.21 | 0.05±0.01  | 0.56±0.06 | 2.97±0.35      | 15.62±1.61 | 3.91±0.46           | 31.35±3.23 | methoxyphenol derivatives |
| homovanillic acid                | 0.05±0.00    | 2.31±0.49  | 0.00±0.00   | 2.86±0.60  | 0.00±0.00  | 5.91±1.25  | 0.00±0.00  | 0.07±0.02 | 0.00±0.00      | 5.46±1.15  | 0.00±0.00           | 2.08±0.44  | methoxyphenol derivatives |
| azelaic acid                     | 0.22±0.05    | 10.51±1.33 | 0.20±0.05   | 17.41±2.21 | 0.25±0.06  | 31.89±4.05 | 0.01±0.00  | 0.30±0.04 | 0.09±0.02      | 5.06±0.64  | 0.00±0.00           | 0.09±0.01  | dicarboxylic acids        |
| myristoleic acid                 | 0.00±0.00    | 8.63±1.61  | 0.00±0.00   | 16.25±3.02 | 0.00±0.00  | 14.57±2.71 | 0.00±0.00  | 0.00±0.00 | 0.00±0.00      | 0.00±0.00  | 0.00±0.00           | 1.83±0.34  | monocarboxylic acids      |
| myristic acid                    | 0.00±0.00    | 21.17±3.34 | 0.00±0.00   | 41.52±6.56 | 0.00±0.00  | 49.81±7.87 | 0.00±0.00  | 0.66±0.10 | 0.28±0.03      | 13.29±2.10 | 0.08±0.01           | 11.01±1.74 | monocarboxylic acids      |
| sebacic acid                     | 0.24±0.00    | 1.93±0.34  | 0.00±0.00   | 3.11±0.55  | 0.00±0.00  | 5.91±1.05  | 0.00±0.00  | 0.07±0.01 | 0.00±0.00      | 1.96±0.35  | 0.00±0.00           | 0.08±0.01  | dicarboxylic acids        |
| syngiolic acid                   | 0.00±0.00    | 6.68±1.07  | 0.07±0.00   | 16.61±2.67 | 0.00±0.00  | 37.86±6.08 | 0.00±0.00  | 0.70±0.11 | 0.13±0.00      | 37.54±6.03 | 0.11±0.00           | 20.03±3.22 | methoxyphenol derivatives |
| pentadecanoic acid               | 0.21±0.04    | 18.91±2.73 | 0.08±0.02   | 17.55±2.53 | 0.00±0.00  | 24.34±3.51 | 0.00±0.00  | 0.25±0.04 | 0.72±0.15      | 9.75±1.41  | 0.16±0.03           | 5.98±0.86  | monocarboxylic acids      |
| undecanedioic acid               | 0.18±0.00    | 0.87±0.11  | 0.22±0.00   | 2.41±0.29  | 0.00±0.00  | 3.34±0.41  | 0.00±0.00  | 0.06±0.01 | 0.00±0.00      | 0.57±0.07  | 0.00±0.00           | 0.00±0.00  | dicarboxylic acids        |
| palmitoleic acid                 | 0.00±0.00    | 5.27±0.59  | 0.00±0.00   | 30.01±3.33 | 0.00±0.00  | 35.41±3.93 | 0.00±0.00  | 0.28±0.03 | 0.43±0.00      | 2.32±0.26  | 0.00±0.00           | 2.21±0.25  | monocarboxylic acids      |
| palmitic acid                    | 0.00±0.00    | 55.72±6.65 | 0.00±0.00   | 12.82±1.53 | 0.00±0.00  | 45.96±5.48 | 0.00±0.00  | 1.83±0.22 | 0.00±0.00      | 51.77±6.18 | 0.00±0.00           | 20.38±2.43 | monocarboxylic acids      |
| isostearic acid                  | 0.00±0.00    | 1.06±0.00  | 0.00±0.00   | 0.00±0.00  | 0.00±0.00  | 1.93±0.00  | 0.00±0.00  | 0.11±0.00 | 0.00±0.00      | 0.00±0.00  | 0.00±0.00           | 0.00±0.00  | monocarboxylic acids      |
| dodecanedioic acid               | 0.00±0.00    | 0.67±0.00  | 0.00±0.00   | 1.02±0.00  | 0.00±0.00  | 1.69±0.00  | 0.00±0.00  | 0.00±0.   |                |            |                     |            |                           |

Table S2a: Aged-to-fresh ratio of methoxyphenol derivatives

| Methoxyphenol derivatives    |              |             |             |             |                |                     |
|------------------------------|--------------|-------------|-------------|-------------|----------------|---------------------|
| Compound name                | Alaskan peat | Moscow peat | Pskov peat  | Eucalyptus  | Malaysian peat | Malaysian agro peat |
| guaiacol                     | 1.15 ± 0.11  | 0.42 ± 0.04 | 0.04 ± 0.00 | 0.00 ± 0.00 | 0.05 ± 0.00    | 0.85 ± 0.08         |
| 4-me-guaiacol                | 0.00 ± 0.00  | 0.06 ± 0.01 | 0.00 ± 0.00 | 0.00 ± 0.00 | 0.33 ± 0.03    | 1.22 ± 0.12         |
| 4-ethyl-guaiacol             | 0.00 ± 0.00  | 0.00 ± 0.00 | 0.00 ± 0.00 | 0.00 ± 0.00 | 0.00 ± 0.00    | 0.00 ± 0.00         |
| syringol                     | 0.00 ± 0.00  | 0.08 ± 0.01 | 0.00 ± 0.00 | 1.68 ± 0.22 | 0.28 ± 0.04    | 0.09 ± 0.01         |
| 4-allyl-guaiacol (eugenol)   | 0.00 ± 0.00  | 0.01 ± 0.00 | 0.00 ± 0.00 | 0.00 ± 0.00 | 0.05 ± 0.01    | 0.09 ± 0.01         |
| 4-methyl-syringol            | 0.00 ± 0.00  | 0.10 ± 0.01 | 0.09 ± 0.01 | 0.26 ± 0.03 | 0.07 ± 0.01    | 0.05 ± 0.01         |
| 4-formyl-guaiacol (vanillin) | 2.03 ± 0.23  | 0.69 ± 0.08 | 0.44 ± 0.05 | 0.31 ± 0.04 | 0.87 ± 0.10    | 2.29 ± 0.26         |
| isoeugenol                   | 0.35 ± 0.05  | 0.07 ± 0.01 | 0.09 ± 0.01 | 0.00 ± 0.00 | 0.19 ± 0.02    | 2.22 ± 0.29         |
| acetovanillone               | 3.14 ± 0.36  | 0.30 ± 0.03 | 0.21 ± 0.02 | 0.65 ± 0.07 | 0.39 ± 0.04    | 1.15 ± 0.13         |
| syringaldehyde               | 1.01 ± 0.11  | 0.38 ± 0.04 | 0.73 ± 0.08 | 0.20 ± 0.02 | 0.25 ± 0.03    | 0.31 ± 0.03         |
| vanillic acid                | 0.74 ± 0.08  | 0.93 ± 0.10 | 1.30 ± 0.13 | 0.34 ± 0.03 | 0.97 ± 0.10    | 0.67 ± 0.07         |
| homovanillic acid            | 0.62 ± 0.13  | 0.50 ± 0.11 | 0.53 ± 0.11 | 0.09 ± 0.02 | 0.56 ± 0.12    | 0.26 ± 0.06         |
| syringic acid                | 0.67 ± 0.11  | 0.74 ± 0.12 | 0.57 ± 0.09 | 0.10 ± 0.02 | 0.74 ± 0.12    | 0.41 ± 0.07         |

Table S2b: Aged-to-fresh ratio of dicarboxylic acids

| Dicarboxylic acids                 |              |             |            |            |                |                     |
|------------------------------------|--------------|-------------|------------|------------|----------------|---------------------|
| Compound name                      | Alaskan peat | Moscow peat | Pskov peat | Eucalyptus | Malaysian peat | Malaysian agro peat |
| me-malonic (d-c3)                  | 0.00±0.00    | 0.00±0.00   | 0.00±0.00  | 0.00±0.00  | 247.42±42.06   | 0.43±0.07           |
| maleic acid                        | 33.57±4.71   | 11.60±1.63  | 19.64±2.75 | 8.17±1.15  | 59.45±8.33     | 0.00±0.00           |
| succinic acid (d-c4)               | 18.28±2.22   | 5.07±0.62   | 7.27±0.89  | 6.06±0.74  | 8.38±1.02      | 0.00±0.00           |
| me-succinic acid (d-c4)            | 2.32±0.25    | 10.45±1.13  | 2.09±0.23  | 1.59±0.17  | 2.80±0.30      | 3.36±0.36           |
| glutaric acid (d-c5)               | 7.21±0.99    | 2.32±0.32   | 1.19±0.16  | 2.40±0.33  | 6.44±0.89      | 24.27±3.35          |
| 2-methylglutaric (d-c5)            | 2.46±0.00    | 1.97±0.00   | 1.14±0.00  | 0.00±0.00  | 4.84±0.00      | 2.04±0.00           |
| 3-methylglutaric acid (d-c5)       | 0.00±0.00    | 8.17±0.00   | 0.00±0.00  | 0.00±0.00  | 2.23±0.00      | 0.00±0.00           |
| hexanedioic (adipic) acid (d-c6)   | 1.54±0.20    | 3.20±0.42   | 14.64±1.94 | 2.78±0.37  | 2.06±0.27      | 3.49±0.46           |
| cis-pinonic acid                   | 0.00±0.00    | 0.47±0.00   | 0.73±0.00  | 0.00±0.00  | 0.00±0.00      | 1.04±0.00           |
| 3-methyladipic acid (d-c6)         | 0.00±0.00    | 0.00±0.00   | 0.00±0.00  | 0.00±0.00  | 1.66±0.37      | 0.00±0.00           |
| heptanedioic (pimelic) acid (d-c7) | 3.21±0.60    | 2.81±0.52   | 2.04±0.38  | 0.00±0.00  | 2.88±0.54      | 0.00±0.00           |
| suberic acid (d-c8)                | 2.33±0.26    | 2.14±0.23   | 2.75±0.30  | 2.20±0.24  | 2.44±0.27      | 0.55±0.06           |
| azelaic acid (d-c9)                | 3.16±0.41    | 1.11±0.14   | 1.26±0.16  | 1.37±0.18  | 3.11±0.40      | 43.95±5.63          |
| sebacic acid (d-c10)               | 3.41±0.61    | 2.71±0.48   | 1.97±0.35  | 1.90±0.34  | 3.22±0.58      | 27.23±4.86          |
| undecanedioic acid (d-c11)         | 5.42±0.66    | 2.46±0.30   | 2.53±0.31  | 0.81±0.10  | 6.45±0.79      | 0.00±0.00           |
| dodecanedioic acid (d-c12)         | 4.02±0.00    | 3.75±0.00   | 2.09±0.00  | 0.00±0.00  | 5.93±0.00      | 0.00±0.00           |
| 1,11-undecanedicarboxylic acid     | 2.87±0.00    | 0.00±0.00   | 2.60±0.00  | 0.00±0.00  | 0.00±0.00      | 0.00±0.00           |
| 1,12-dodecanedicarboxylic acid     | 3.17±0.40    | 0.00±0.00   | 2.68±0.34  | 0.00±0.00  | 5.31±0.66      | 0.00±0.00           |

Table S2c: Aged-to-fresh ratio of monocarboxylic acids

| <b>Monocarboxylic acids</b>    |                     |                    |                   |                   |                       |                            |
|--------------------------------|---------------------|--------------------|-------------------|-------------------|-----------------------|----------------------------|
| <b>Compound name</b>           | <b>Alaskan peat</b> | <b>Moscow peat</b> | <b>Pskov peat</b> | <b>Eucalyptus</b> | <b>Malaysian peat</b> | <b>Malaysian agro peat</b> |
| hexanoic acid (c6)             | 0.89±0.09           | 0.88±0.09          | 0.33±0.03         | 0.53±0.05         | 1.47±0.14             | 1.40±0.14                  |
| heptanoic acid (c7)            | 1.15±0.13           | 2.37±0.27          | 0.93±0.11         | 0.49±0.06         | 1.92±0.22             | 1.31±0.15                  |
| octanoic acid (c8)             | 0.88±0.08           | 0.85±0.08          | 0.48±0.05         | 0.10±0.01         | 1.27±0.12             | 0.78±0.07                  |
| nonanoic acid (c9)             | 1.97±0.23           | 0.97±0.12          | 0.68±0.08         | 0.41±0.05         | 2.46±0.29             | 0.25±0.03                  |
| decanoic acid (c10)            | 1.01±0.10           | 1.84±0.18          | 0.86±0.08         | 0.25±0.02         | 1.82±0.18             | 0.99±0.10                  |
| undecanoic acid (c11)          | 0.42±0.04           | 1.20±0.12          | 0.71±0.07         | 0.52±0.05         | 1.36±0.13             | 1.20±0.12                  |
| dodecanoic (lauric) acid (c12) | 0.49±0.08           | 0.98±0.15          | 0.52±0.08         | 0.40±0.06         | 0.93±0.14             | 0.54±0.08                  |
| tridecanoic acid (c13)         | 0.89±0.11           | 1.28±0.16          | 0.88±0.11         | 0.63±0.08         | 1.45±0.18             | 1.18±0.15                  |
| myristoleic acid               | 0.00±0.00           | 0.09±0.02          | 0.00±0.00         | 0.00±0.00         | 0.00±0.00             | 0.20±0.04                  |
| myristic acid (c14)            | 0.57±0.09           | 0.86±0.13          | 0.47±0.07         | 0.36±0.06         | 0.68±0.11             | 0.72±0.11                  |
| pentadecanoic acid (c15)       | 0.67±0.10           | 1.14±0.17          | 0.62±0.09         | 0.47±0.07         | 0.78±0.11             | 0.96±0.14                  |
| palmitoleic acid               | 0.00±0.00           | 0.11±0.01          | 0.00±0.00         | 0.00±0.00         | 0.00±0.00             | 0.00±0.00                  |
| palmitic acid (c16)            | 0.63±0.08           | 1.36±0.16          | 1.05±0.13         | 0.51±0.06         | 0.67±0.08             | 0.59±0.07                  |
| isostearic acid                | 0.00±0.00           | 0.00±0.00          | 0.00±0.00         | 0.00±0.00         | 0.00±0.00             | 0.00±0.00                  |
| traumatic acid                 | 0.86±0.10           | 1.14±0.14          | 0.68±0.08         | 0.40±0.05         | 0.79±0.09             | 0.80±0.10                  |
| heptadecanoic acid (c17)       | 0.83±0.10           | 1.12±0.14          | 0.65±0.08         | 0.35±0.04         | 0.72±0.09             | 1.05±0.13                  |
| oleic acid                     | 0.09±0.01           | 0.17±0.02          | 0.14±0.02         | 0.42±0.05         | 0.16±0.02             | 0.60±0.08                  |
| elaidic acid                   | 0.03±0.00           | 0.00±0.00          | 0.00±0.00         | 0.00±0.00         | 0.07±0.01             | 0.16±0.02                  |
| stearic acid (c18)             | 0.63±0.10           | 1.20±0.19          | 0.73±0.12         | 0.50±0.08         | 0.82±0.13             | 0.81±0.13                  |
| nonadecanoic acid (c19)        | 0.85±0.08           | 0.79±0.08          | 0.66±0.06         | 0.37±0.04         | 1.99±0.19             | 1.28±0.12                  |
| eicosanoic acid (c20)          | 1.08±0.13           | 1.03±0.12          | 0.70±0.09         | 0.35±0.04         | 0.90±0.11             | 0.95±0.12                  |
| heneicosanoic acid (c21)       | 0.75±0.08           | 0.78±0.08          | 0.81±0.08         | 0.50±0.05         | 1.43±0.14             | 1.56±0.16                  |
| docosanoic acid (c22)          | 0.48±0.05           | 0.89±0.09          | 1.48±0.14         | 0.29±0.03         | 0.76±0.07             | 1.04±0.10                  |
| tricosanoic acid               | 0.73±0.08           | 0.79±0.08          | 0.82±0.09         | 0.23±0.02         | 0.87±0.09             | 1.75±0.18                  |
| tetracosanoic acid (c24)       | 0.53±0.06           | 0.19±0.02          | 1.24±0.15         | 0.26±0.03         | 0.61±0.07             | 0.73±0.09                  |

Table S2d: Aged-to-fresh ratio of aromatic acids

| Aromatic acids                   |              |             |            |            |                |                     |
|----------------------------------|--------------|-------------|------------|------------|----------------|---------------------|
| Compound name                    | Alaskan peat | Moscow peat | Pskov peat | Eucalyptus | Malaysian peat | Malaysian agro peat |
| benzoic acid                     | 0.81±0.08    | 0.69±0.07   | 0.73±0.07  | 0.00±0.00  | 4.49±0.44      | 2.32±0.23           |
| o-toluic                         | 1.93±0.21    | 0.34±0.04   | 0.42±0.05  | 0.00±0.00  | 0.78±0.09      | 5.26±0.58           |
| m-toluic                         | 1.33±0.16    | 1.07±0.13   | 0.69±0.08  | 1.16±0.14  | 1.12±0.13      | 1.75±0.21           |
| p-toluic                         | 1.17±0.17    | 0.84±0.12   | 0.53±0.08  | 0.55±0.08  | 1.24±0.18      | 2.67±0.39           |
| 2,6-dimethylbenzoic acid         | 0.00±0.00    | 0.00±0.00   | 0.00±0.00  | 0.00±0.00  | 2.34±0.00      | 6.56±0.00           |
| 2,5-dimethylbenzoic acid         | 1.31±0.20    | 0.73±0.11   | 0.51±0.08  | 0.00±0.00  | 0.74±0.11      | 1.44±0.22           |
| 2,4-dimethylbenzoic acid         | 0.00±0.00    | 0.46±0.04   | 0.00±0.00  | 0.00±0.00  | 0.69±0.07      | 0.00±0.00           |
| 2,3-and 3,5-dimethylbenzoic acid | 0.74±0.00    | 0.73±0.00   | 0.92±0.00  | 1.01±0.00  | 0.93±0.00      | 0.54±0.00           |
| 3,4-dimethylbenzoic acid         | 0.96±0.12    | 0.65±0.08   | 0.37±0.04  | 0.00±0.00  | 1.00±0.12      | 4.14±0.51           |
| salicylic acid                   | 1.53±0.23    | 1.30±0.19   | 0.90±0.13  | 1.45±0.22  | 1.12±0.17      | 1.18±0.18           |
| 2,3-dimethoxybenzoic acid        | 1.49±0.37    | 0.35±0.09   | 0.68±0.17  | 0.44±0.11  | 1.91±0.48      | 1.62±0.41           |
| 2,6-dimethoxybenzoic acid        | 0.00±0.00    | 0.00±0.00   | 0.00±0.00  | 0.00±0.00  | 0.00±0.00      | 0.10±0.00           |
| 2,5-dimethoxybenzoic acid        | 0.00±0.00    | 0.00±0.00   | 0.00±0.00  | 0.00±0.00  | 0.00±0.00      | 0.00±0.00           |
| phthalic acid                    | 10.48±1.83   | 0.00±0.00   | 0.00±0.00  | 0.00±0.00  | 6.68±1.17      | 0.00±0.00           |
| 3,5-dimethoxybenzoic acid        | 0.00±0.00    | 0.00±0.00   | 0.00±0.00  | 0.00±0.00  | 0.71±0.13      | 0.33±0.06           |
| 3,4-dimethoxybenzoic acid        | 2.23±0.30    | 0.67±0.09   | 0.00±0.00  | 0.00±0.00  | 0.72±0.10      | 0.31±0.04           |
| 2,4-dimethoxybenzoic acid        | 0.00±0.00    | 0.00±0.00   | 0.00±0.00  | 0.00±0.00  | 0.00±0.00      | 0.00±0.00           |
| isophthalic acid                 | 2.46±0.27    | 1.67±0.18   | 1.58±0.17  | 1.64±0.18  | 6.57±0.71      | 5.32±0.58           |

Table S2e: Aged-to-fresh ratio of resin acids and levoglucosan

| Resin acids & Levoglucosan  |              |             |            |            |                |                     |
|-----------------------------|--------------|-------------|------------|------------|----------------|---------------------|
| Compound name               | Alaskan peat | Moscow peat | Pskov peat | Eucalyptus | Malaysian peat | Malaysian agro peat |
| 8,15-pimaradien-18-oic acid | 0.00±0.00    | 0.00±0.00   | 0.00±0.00  | 0.00±0.00  | 0.00±0.00      | 0.00±0.00           |
| pimaric acid                | 0.46±0.07    | 0.00±0.00   | 0.00±0.00  | 0.00±0.00  | 0.00±0.00      | 0.00±0.00           |
| sandaracopimaric acid       | 0.00±0.00    | 0.00±0.00   | 0.00±0.00  | 0.00±0.00  | 0.00±0.00      | 0.00±0.00           |
| isopimaric acid             | 0.36±0.06    | 0.37±0.07   | 0.00±0.00  | 0.00±0.00  | 0.78±0.14      | 0.00±0.00           |
| dehydroabietic acid         | 0.62±0.09    | 0.80±0.12   | 0.49±0.07  | 0.44±0.07  | 1.01±0.15      | 0.48±0.07           |
| abietic acid                | 0.08±0.01    | 0.00±0.00   | 0.00±0.00  | 0.00±0.00  | 0.00±0.00      | 0.00±0.00           |
| 7-oxodehydroabietic acid    | 0.88±0.09    | 0.51±0.05   | 0.58±0.06  | 0.00±0.00  | 0.99±0.10      | 0.00±0.00           |
| Levoglucosan*               |              |             |            | 0.69±0.02  | 0.67±0.02      |                     |

\*Levoglucosan data were analyzed using IC-PAD technique for two fuels

### 3.3.4 Aromatic Acids

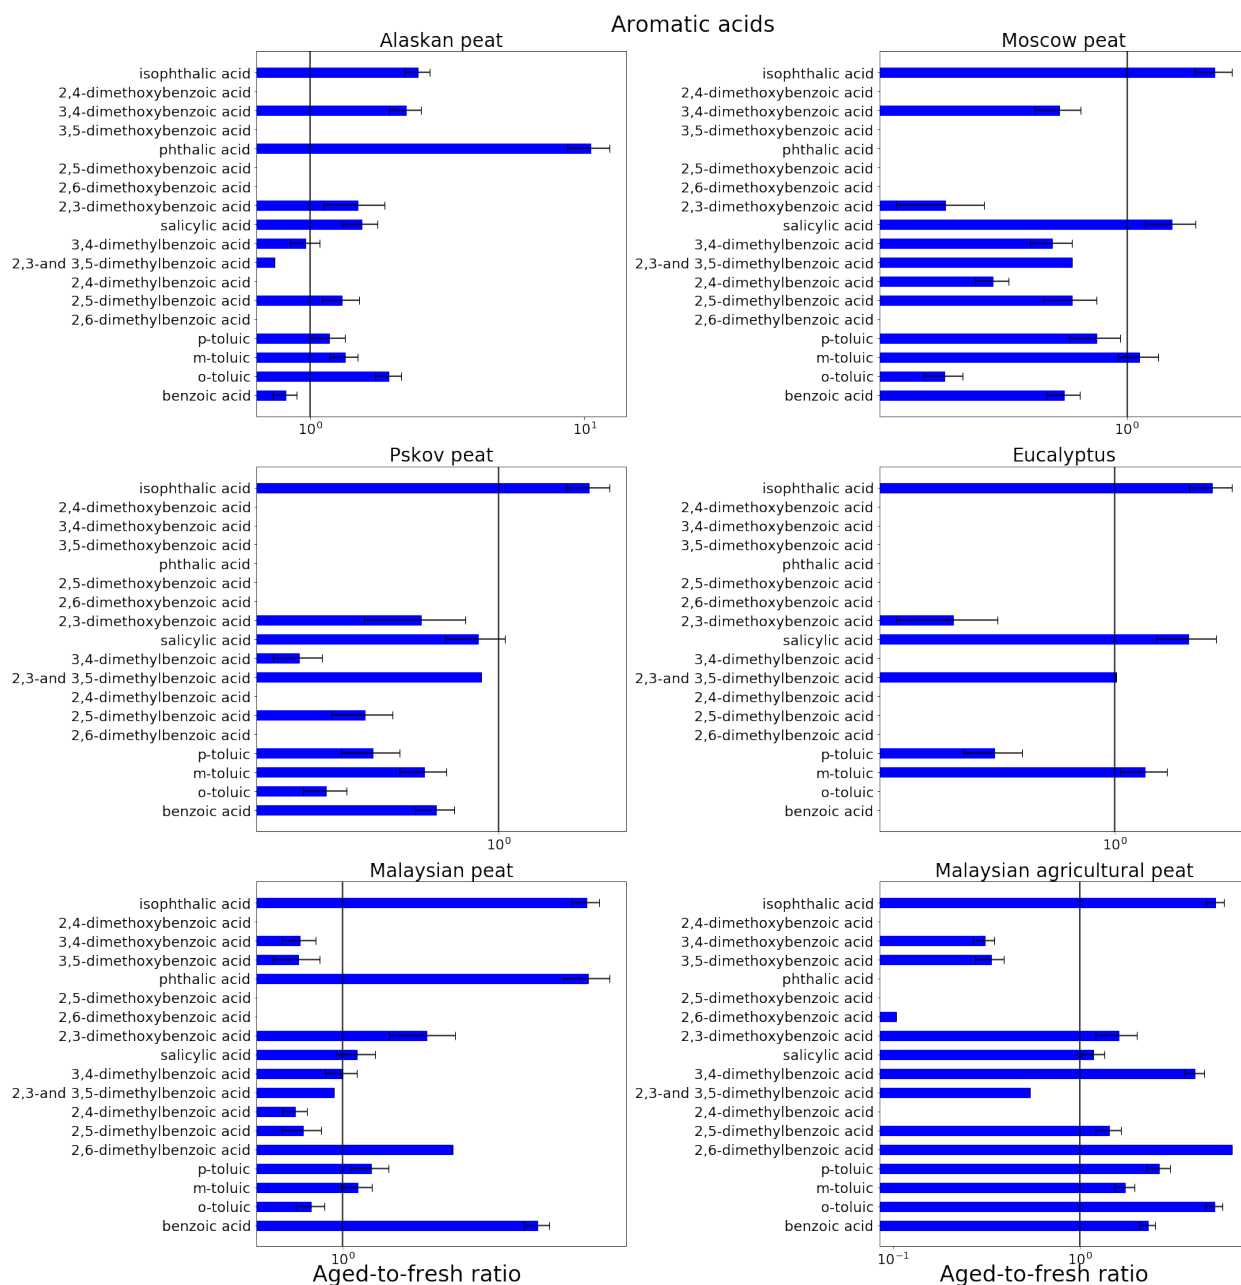

Figure S2a. Aged-to-fresh ratios of total (gas + particle) EF's for aromatic acids from biomass burning emissions for six different biomass type presented in log scale . We did not burn fuels in replicates, and SD were calculated based on replicate analysis of similar fuels (with same experimental conditions) from our previous campaigns. SD values derived from EFs were scaled to ratio.

### 3.3.5 Resin Acids

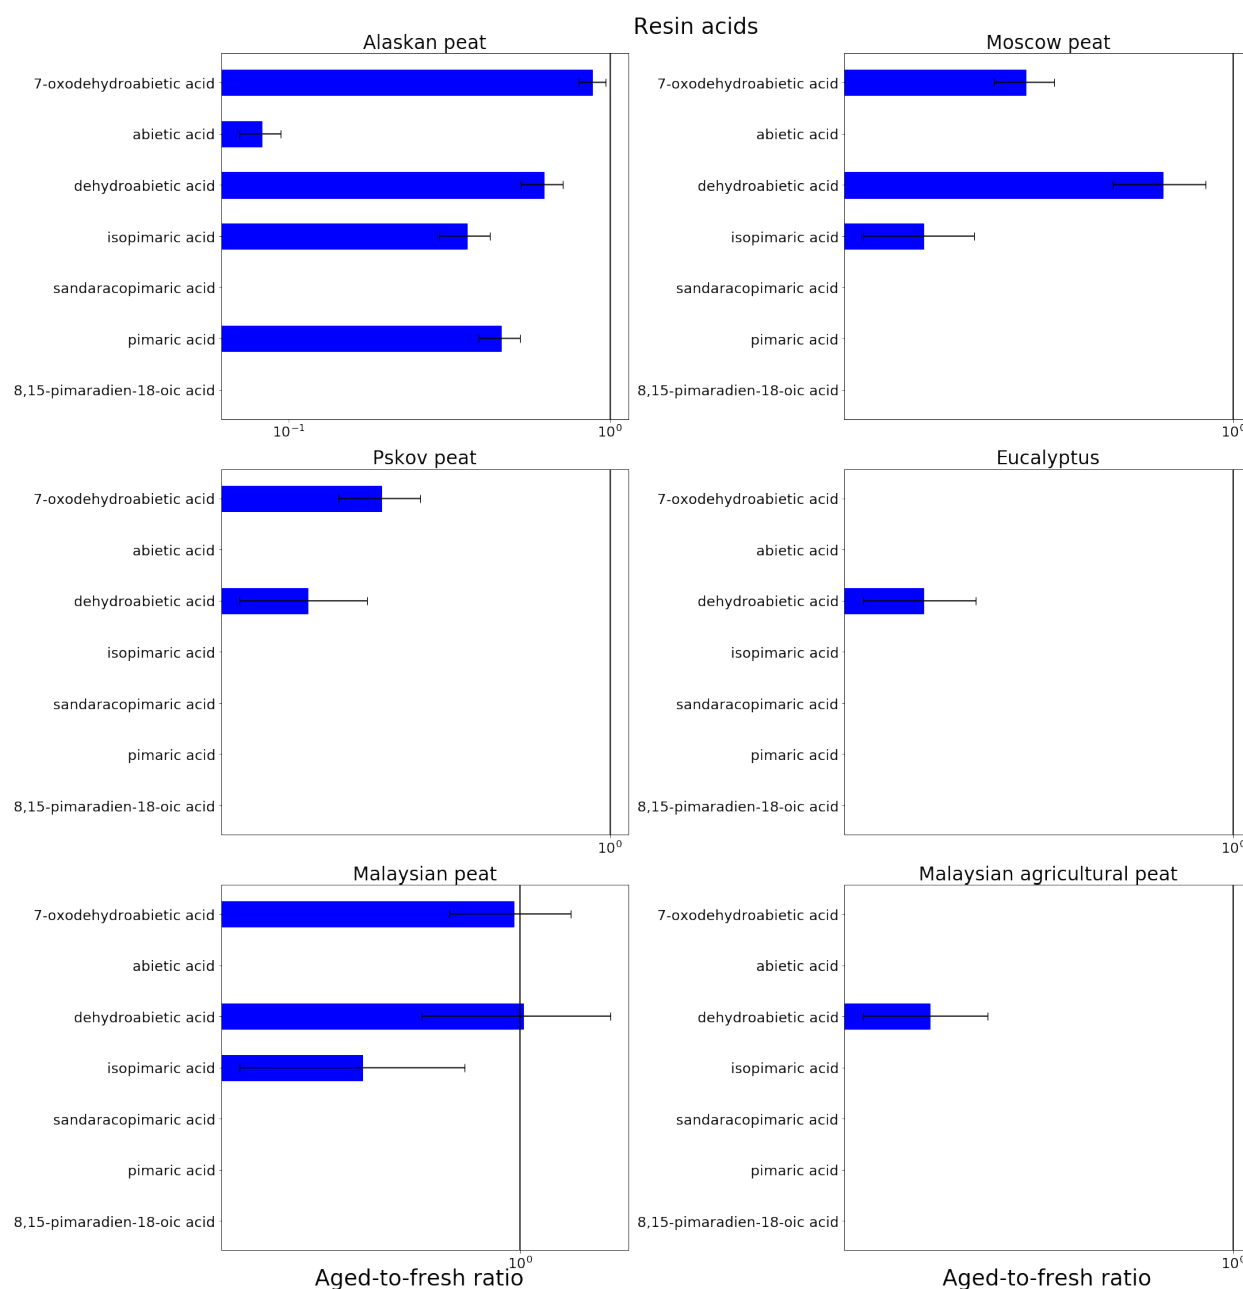

Figure S2b. Aged-to-fresh ratios of total (gas + particle) EFs for resin acids from biomass burning emissions for six different biomass type presented in log scale. We did not burn fuels in replicates, and SD were calculated based on replicate analysis of similar fuels (with same experimental conditions) from our previous campaigns. SD values derived from EFs were scaled to ratio.
